# Supplementary material
Source: Frontiers journal article supplement (https://www.frontiersin.org/articles/438863)
Supplement: Table_1.XLSX [file Table_1.XLSX]

## Sheet: S1
Bat host species	Summer roosts	Winter roosts	Mating system
Eptesicus nilssonii	buildings	buildings, caves	autumn swarming
Eptesicus serotinus	buildings	buildings, caves	local mating
Miniopterus schreibersii	caves	caves	unknown
Myotis bechsteinii	tree cavities	caves	autumn swarming
Myotis blythii	caves	caves	temporary harems
Myotis capaccinii	caves	caves	unknown
Myotis dasycneme	buildings	buildings, caves	autumn swarming
Myotis daubentonii	tree cavities	caves	autumn swarming, local mating
Myotis emarginatus	buildings, caves	caves	autumn swarming
Myotis myotis	buildings, caves	caves	temporary harems, autumn swarming
Myotis mystacinus	tree cavities, buildings	caves	autumn swarming
Myotis nattereri	tree cavities, buildings	caves	autumn swarming
Nyctalus noctula	tree cavities, buildings	tree cavities, buildings	temporary harems
Pipistrellus nathusii	tree cavities	tree cavities	temporary harems
Pipistrellus pipistrellus	buildings	buildings, caves	temporary harems, autumn swarming
Pipistrellus pygmaeus	tree cavities, buildings	tree cavities, buildings	temporary harems
Plecotus auritus	tree cavities, buildings	tree cavities, buildings	autumn swarming, local mating
Rhinolophus blasii	caves	caves	temporary harems
Rhinolophus euryale	buildings, caves	caves	temporary harems
Rhinolophus ferrumequinum	buildings, caves	caves	temporary harems
Rhinolophus mehelyi	caves	caves	temporary harems

## Sheet: S2
	Ept.nil	Ept.ser	Min.sch	Myo.bec	Myo.bly	Myo.cap	Myo.das	Myo.dau	Myo.ema	Myo.myo	Myo.mys	Myo.nat	Nyc.noc	Pip.nat	Pip.pip	Pip.pyg	Ple.aur	Rhi.bla	Rhi.eur	Rhi.fer	Rhi.meh
Ept.nil	1	0	0	0	0	0	0	0	0	0	0	0	0	0	0	0	0	0	0	0	0
Ept.ser	0	1	0	0	0	0	1	0	0	0	1	0	0	0	1	0	1	0	0	0	0
Min.sch	0	0	1	0	1	1	0	0	1	1	0	0	0	0	0	0	0	1	1	1	1
Myo.bec	0	0	0	1	0	0	0	0	0	0	0	1	1	0	0	0	1	0	0	0	0
Myo.bly	0	0	1	0	1	0	0	0	0	1	0	0	0	0	0	0	0	0	0	1	0
Myo.cap	0	0	1	0	0	1	0	0	0	0	0	0	0	0	0	0	0	0	0	0	0
Myo.das	0	1	0	0	0	0	1	1	0	0	0	0	0	1	1	0	0	0	0	0	0
Myo.dau	0	0	0	0	0	0	1	1	0	0	0	0	1	0	1	0	0	0	0	0	0
Myo.ema	0	0	1	0	0	0	0	0	1	0	0	0	0	0	0	0	0	0	0	1	1
Myo.myo	0	0	1	0	1	0	0	0	0	1	0	0	1	0	0	0	0	0	0	0	0
Myo.mys	0	1	0	0	0	0	0	0	0	0	1	0	0	1	1	0	0	0	0	0	0
Myo.nat	0	0	0	1	0	0	0	0	0	0	0	1	0	0	0	0	1	0	0	0	0
Nyc.noc	0	0	0	1	0	0	0	1	0	1	0	0	1	0	1	1	1	0	0	0	0
Pip.nat	0	0	0	0	0	0	1	0	0	0	1	0	0	1	1	0	0	0	0	0	0
Pip.pip	0	1	0	0	0	0	1	1	0	0	1	0	1	1	1	1	1	0	0	0	0
Pip.pyg	0	0	0	0	0	0	0	0	0	0	0	0	1	0	1	1	0	0	0	0	0
Ple.aur	0	1	0	1	0	0	0	0	0	0	0	1	1	0	1	0	1	0	0	0	0
Rhi.bla	0	0	1	0	0	0	0	0	0	0	0	0	0	0	0	0	0	1	1	1	1
Rhi.eur	0	0	1	0	0	0	0	0	0	0	0	0	0	0	0	0	0	1	1	1	1
Rhi.fer	0	0	1	0	1	0	0	0	1	0	0	0	0	0	0	0	0	1	1	1	1
Rhi.meh	0	0	1	0	0	0	0	0	1	0	0	0	0	0	0	0	0	1	1	1	1

## Sheet: S3
Ectoparasite species	Species abbreviation	Host	Number of records (including this study)
Argas vespertilionis	Arg.ves	Eptesicus nilssonii	6
Argas vespertilionis	Arg.ves	Eptesicus serotinus	12
Argas vespertilionis	Arg.ves	Myotis bechsteinii	1
Argas vespertilionis	Arg.ves	Myotis blythii	2
Argas vespertilionis	Arg.ves	Myotis dasycneme	4
Argas vespertilionis	Arg.ves	Myotis daubentonii	3
Argas vespertilionis	Arg.ves	Myotis myotis	7
Argas vespertilionis	Arg.ves	Myotis mystacinus	7
Argas vespertilionis	Arg.ves	Myotis nattereri	3
Argas vespertilionis	Arg.ves	Nyctalus noctula	5
Argas vespertilionis	Arg.ves	Pipistrellus nathusii	7
Argas vespertilionis	Arg.ves	Pipistrellus pipistrellus	32
Argas vespertilionis	Arg.ves	Pipistrellus pygmaeus	6
Argas vespertilionis	Arg.ves	Plecotus auritus	5
Argas vespertilionis	Arg.ves	Rhinolophus euryale	1
Argas vespertilionis	Arg.ves	Rhinolophus ferrumequinum	2
Basilia nana	Bas.nan	Miniopterus schreibersii	1
Basilia nana	Bas.nan	Myotis bechsteinii	32
Basilia nana	Bas.nan	Myotis blythii	3
Basilia nana	Bas.nan	Myotis dasycneme	5
Basilia nana	Bas.nan	Myotis daubentonii	5
Basilia nana	Bas.nan	Myotis emarginatus	3
Basilia nana	Bas.nan	Myotis myotis	14
Basilia nana	Bas.nan	Myotis mystacinus	4
Basilia nana	Bas.nan	Myotis nattereri	15
Basilia nana	Bas.nan	Pipistrellus pipistrellus	1
Basilia nana	Bas.nan	Plecotus auritus	6
Basilia nana	Bas.nan	Rhinolophus ferrumequinum	1
Basilia nattereri	Bas.nat	Eptesicus serotinus	5
Basilia nattereri	Bas.nat	Myotis bechsteinii	3
Basilia nattereri	Bas.nat	Myotis daubentonii	4
Basilia nattereri	Bas.nat	Myotis emarginatus	1
Basilia nattereri	Bas.nat	Myotis myotis	2
Basilia nattereri	Bas.nat	Myotis mystacinus	2
Basilia nattereri	Bas.nat	Myotis nattereri	15
Basilia nattereri	Bas.nat	Plecotus auritus	4
Cimex pipistrelli	Cim.pip	Eptesicus serotinus	2
Cimex pipistrelli	Cim.pip	Myotis bechsteinii	1
Cimex pipistrelli	Cim.pip	Myotis blythii	2
Cimex pipistrelli	Cim.pip	Myotis dasycneme	5
Cimex pipistrelli	Cim.pip	Myotis daubentonii	7
Cimex pipistrelli	Cim.pip	Myotis emarginatus	4
Cimex pipistrelli	Cim.pip	Myotis myotis	13
Cimex pipistrelli	Cim.pip	Myotis mystacinus	2
Cimex pipistrelli	Cim.pip	Myotis nattereri	4
Cimex pipistrelli	Cim.pip	Nyctalus noctula	8
Cimex pipistrelli	Cim.pip	Pipistrellus nathusii	1
Cimex pipistrelli	Cim.pip	Pipistrellus pipistrellus	3
Cimex pipistrelli	Cim.pip	Pipistrellus pygmaeus	7
Cimex pipistrelli	Cim.pip	Rhinolophus ferrumequinum	1
Ischnopsyllus variabilis	Isc.var	Eptesicus nilssonii	1
Ischnopsyllus variabilis	Isc.var	Eptesicus serotinus	2
Ischnopsyllus variabilis	Isc.var	Myotis dasycneme	2
Ischnopsyllus variabilis	Isc.var	Myotis daubentonii	1
Ischnopsyllus variabilis	Isc.var	Myotis myotis	1
Ischnopsyllus variabilis	Isc.var	Myotis mystacinus	1
Ischnopsyllus variabilis	Isc.var	Myotis nattereri	1
Ischnopsyllus variabilis	Isc.var	Nyctalus noctula	4
Ischnopsyllus variabilis	Isc.var	Pipistrellus nathusii	6
Ischnopsyllus variabilis	Isc.var	Pipistrellus pipistrellus	2
Ischnopsyllus variabilis	Isc.var	Plecotus auritus	1
Ixodes ariadnae	Ixo.ari	Myotis bechsteinii	2
Ixodes ariadnae	Ixo.ari	Myotis blythii	1
Ixodes ariadnae	Ixo.ari	Myotis dasycneme	1
Ixodes ariadnae	Ixo.ari	Myotis daubentonii	2
Ixodes ariadnae	Ixo.ari	Myotis emarginatus	1
Ixodes ariadnae	Ixo.ari	Myotis myotis	2
Ixodes ariadnae	Ixo.ari	Myotis nattereri	1
Ixodes ariadnae	Ixo.ari	Pipistrellus pygmaeus	1
Ixodes ariadnae	Ixo.ari	Plecotus auritus	3
Macronyssidae sp. 4	Mac.sp4	Myotis dasycneme	1
Nycteribia kolenatii	Nyb.kol	Eptesicus serotinus	5
Nycteribia kolenatii	Nyb.kol	Miniopterus schreibersii	3
Nycteribia kolenatii	Nyb.kol	Myotis bechsteinii	9
Nycteribia kolenatii	Nyb.kol	Myotis blythii	2
Nycteribia kolenatii	Nyb.kol	Myotis capaccinii	1
Nycteribia kolenatii	Nyb.kol	Myotis dasycneme	5
Nycteribia kolenatii	Nyb.kol	Myotis daubentonii	39
Nycteribia kolenatii	Nyb.kol	Myotis emarginatus	1
Nycteribia kolenatii	Nyb.kol	Myotis myotis	12
Nycteribia kolenatii	Nyb.kol	Myotis mystacinus	5
Nycteribia kolenatii	Nyb.kol	Myotis nattereri	12
Nycteribia kolenatii	Nyb.kol	Nyctalus noctula	2
Nycteribia kolenatii	Nyb.kol	Pipistrellus pipistrellus	4
Nycteribia kolenatii	Nyb.kol	Plecotus auritus	3
Nycteribia kolenatii	Nyb.kol	Rhinolophus ferrumequinum	3
Nycteribia schmidlii	Nyb.sch	Eptesicus serotinus	1
Nycteribia schmidlii	Nyb.sch	Miniopterus schreibersii	35
Nycteribia schmidlii	Nyb.sch	Myotis bechsteinii	3
Nycteribia schmidlii	Nyb.sch	Myotis blythii	8
Nycteribia schmidlii	Nyb.sch	Myotis capaccinii	7
Nycteribia schmidlii	Nyb.sch	Myotis daubentonii	11
Nycteribia schmidlii	Nyb.sch	Myotis myotis	16
Nycteribia schmidlii	Nyb.sch	Myotis mystacinus	1
Nycteribia schmidlii	Nyb.sch	Pipistrellus pipistrellus	6
Nycteribia schmidlii	Nyb.sch	Plecotus auritus	2
Nycteribia schmidlii	Nyb.sch	Rhinolophus blasii	1
Nycteribia schmidlii	Nyb.sch	Rhinolophus euryale	5
Nycteribia schmidlii	Nyb.sch	Rhinolophus ferrumequinum	7
Nycteribia schmidlii	Nyb.sch	Rhinolophus mehelyi	4
Penicillidia conspicua	Pen.con	Miniopterus schreibersii	29
Penicillidia conspicua	Pen.con	Myotis blythii	5
Penicillidia conspicua	Pen.con	Myotis capaccinii	3
Penicillidia conspicua	Pen.con	Myotis daubentonii	3
Penicillidia conspicua	Pen.con	Myotis myotis	8
Penicillidia conspicua	Pen.con	Myotis mystacinus	1
Penicillidia conspicua	Pen.con	Plecotus auritus	1
Penicillidia conspicua	Pen.con	Rhinolophus blasii	2
Penicillidia conspicua	Pen.con	Rhinolophus euryale	7
Penicillidia conspicua	Pen.con	Rhinolophus ferrumequinum	2
Penicillidia dufourii	Pen.duf	Eptesicus serotinus	1
Penicillidia dufourii	Pen.duf	Miniopterus schreibersii	26
Penicillidia dufourii	Pen.duf	Myotis blythii	26
Penicillidia dufourii	Pen.duf	Myotis capaccinii	19
Penicillidia dufourii	Pen.duf	Myotis dasycneme	1
Penicillidia dufourii	Pen.duf	Myotis daubentonii	5
Penicillidia dufourii	Pen.duf	Myotis emarginatus	4
Penicillidia dufourii	Pen.duf	Myotis myotis	31
Penicillidia dufourii	Pen.duf	Myotis nattereri	4
Penicillidia dufourii	Pen.duf	Plecotus auritus	1
Penicillidia dufourii	Pen.duf	Rhinolophus blasii	3
Penicillidia dufourii	Pen.duf	Rhinolophus euryale	8
Penicillidia dufourii	Pen.duf	Rhinolophus ferrumequinum	6
Penicillidia dufourii	Pen.duf	Rhinolophus mehelyi	1
Phthiridium biarticulatum	Pht.bia	Eptesicus serotinus	1
Phthiridium biarticulatum	Pht.bia	Miniopterus schreibersii	9
Phthiridium biarticulatum	Pht.bia	Myotis blythii	4
Phthiridium biarticulatum	Pht.bia	Myotis capaccinii	4
Phthiridium biarticulatum	Pht.bia	Myotis dasycneme	1
Phthiridium biarticulatum	Pht.bia	Myotis daubentonii	2
Phthiridium biarticulatum	Pht.bia	Myotis emarginatus	1
Phthiridium biarticulatum	Pht.bia	Myotis myotis	11
Phthiridium biarticulatum	Pht.bia	Pipistrellus pipistrellus	3
Phthiridium biarticulatum	Pht.bia	Plecotus auritus	4
Phthiridium biarticulatum	Pht.bia	Rhinolophus blasii	13
Phthiridium biarticulatum	Pht.bia	Rhinolophus euryale	16
Phthiridium biarticulatum	Pht.bia	Rhinolophus ferrumequinum	33
Phthiridium biarticulatum	Pht.bia	Rhinolophus mehelyi	9
Spinturnicidae sp. 2	Spi.sp2	Nyctalus noctula	1
Spinturnicidae sp. 2	Spi.sp2	Pipistrellus nathusii	1
Spinturnix andegavinus	Spi.and	Myotis bechsteinii	1
Spinturnix andegavinus	Spi.and	Myotis blythii	1
Spinturnix andegavinus	Spi.and	Myotis dasycneme	4
Spinturnix andegavinus	Spi.and	Myotis daubentonii	19
Spinturnix andegavinus	Spi.and	Myotis myotis	3
Spinturnix andegavinus	Spi.and	Myotis mystacinus	1
Spinturnix andegavinus	Spi.and	Myotis nattereri	3
Spinturnix andegavinus	Spi.and	Nyctalus noctula	1
Spinturnix andegavinus	Spi.and	Pipistrellus nathusii	1
Spinturnix andegavinus	Spi.and	Pipistrellus pipistrellus	1
(Spinturnicidae sp. 1) Spinturnix kolenatii*	Spi.kol	Eptesicus nilssonii	10
(Spinturnicidae sp. 1) Spinturnix kolenatii*	Spi.kol	Eptesicus serotinus	10
(Spinturnicidae sp. 1) Spinturnix kolenatii*	Spi.kol	Myotis blythii	1
(Spinturnicidae sp. 1) Spinturnix kolenatii*	Spi.kol	Myotis daubentonii	1
(Spinturnicidae sp. 1) Spinturnix kolenatii*	Spi.kol	Myotis mystacinus	1
(Spinturnicidae sp. 1) Spinturnix kolenatii*	Spi.kol	Nyctalus noctula	2
(Spinturnicidae sp. 1) Spinturnix kolenatii*	Spi.kol	Pipistrellus nathusii	1
(Spinturnicidae sp. 1) Spinturnix kolenatii*	Spi.kol	Plecotus auritus	1
Spinturnix myoti	Spi.myo	Eptesicus nilssonii	1
Spinturnix myoti	Spi.myo	Eptesicus serotinus	2
Spinturnix myoti	Spi.myo	Miniopterus schreibersii	7
Spinturnix myoti	Spi.myo	Myotis blythii	18
Spinturnix myoti	Spi.myo	Myotis capaccinii	8
Spinturnix myoti	Spi.myo	Myotis dasycneme	6
Spinturnix myoti	Spi.myo	Myotis daubentonii	10
Spinturnix myoti	Spi.myo	Myotis emarginatus	5
Spinturnix myoti	Spi.myo	Myotis myotis	30
Spinturnix myoti	Spi.myo	Myotis mystacinus	4
Spinturnix myoti	Spi.myo	Myotis nattereri	13
Spinturnix myoti	Spi.myo	Nyctalus noctula	1
Spinturnix myoti	Spi.myo	Pipistrellus nathusii	2
Spinturnix myoti	Spi.myo	Pipistrellus pipistrellus	2
Spinturnix myoti	Spi.myo	Plecotus auritus	5
Spinturnix myoti	Spi.myo	Rhinolophus euryale	2
Spinturnix myoti	Spi.myo	Rhinolophus ferrumequinum	3
Spinturnix myoti	Spi.myo	Rhinolophus mehelyi	1
Spinturnix plecotina	Spi.ple	Eptesicus nilssonii	5
Spinturnix plecotina	Spi.ple	Eptesicus serotinus	2
Spinturnix plecotina	Spi.ple	Myotis daubentonii	2
Spinturnix plecotina	Spi.ple	Myotis myotis	1
Spinturnix plecotina	Spi.ple	Myotis mystacinus	2
Spinturnix plecotina	Spi.ple	Myotis nattereri	1
Spinturnix plecotina	Spi.ple	Nyctalus noctula	5
Spinturnix plecotina	Spi.ple	Plecotus auritus	19
Spinturnix plecotina	Spi.ple	Rhinolophus ferrumequinum	4
*Inferred based on phylogenetic position and host associations from Bruyndonckx et al. (2009).
Data come from a compilation of 212 studies on ectoparasites from European bats (Aellen, 1955, 1963; Albayrak, 2003; Amr and Qumsiyeh, 1993; Aznar-Lopez et al., 2013; Baagøe, 2011b, 2011a; Baker and Craven, 2003; Balcells, 1968b, 1968a, Balvín et al., 2012, 2013, 2015; Balvín and Bartonička, 2014; Bartonička, 2007, 2008, 2010; Bartonička and Gaisler, 2007; Bartonička and Růžičková, 2012; Baulechn…

## Sheet: S4
GenBank accession number (or strain ID)	Country	Host species
AJ871611	United Kingdom	Pipistrellus sp.
AJ871612	United Kingdom	Myotis mystacinus
AJ871613	United Kingdom	Myotis daubentonii
AJ871614	United Kingdom	Pipistrellus sp.
AJ871615	United Kingdom	Nyctalus noctula
FJ376732	USA	Homo sapiens
FJ946847	Thailand	Canis familiaris
FJ946848	Thailand	Canis familiaris
FJ946850	Thailand	Canis familiaris
FJ946851	Thailand	Canis familiaris
FJ946852	Thailand	Canis familiaris
FJ946853	Thailand	Canis familiaris
FJ946854	Thailand	Canis familiaris
FJ946855	Thailand	Canis familiaris
HM116784	Poland	Homo sapiens
HM116785	Poland	Homo sapiens
HM116786	Poland	Homo sapiens
HM363764	Kenya	Rousettus aegyptiacus
HM545136	Kenya	Coleura afra
HM545137	Kenya	Hipposideros sp.
HM545138	Kenya	Triaenops persicus
HM545139	Kenya	Miniopterus sp.
HM545140	Kenya	Miniopterus sp.
HM545141	Kenya	Miniopterus sp.
HM597187	Guatemala	Desmodus rotundus
HM597188	Guatemala	Desmodus rotundus
HM597189	Guatemala	Desmodus rotundus
HM597190	Guatemala	Desmodus rotundus
HM597191	Guatemala	Desmodus rotundus/Carollia perspicillata
HM597192	Guatemala	Desmodus rotundus/Carollia perspicillata
HM597193	Guatemala	Pteronotus davyi
HM597194	Guatemala	Pteronotus davyi
HM597195	Guatemala	Desmodus rotundus
HM597196	Guatemala	Desmodus rotundus
HM597197	Guatemala	Artibeus toltecus
HM597198	Guatemala	Phyllostomus discolor
HM597199	Guatemala	Carollia perspicillata
HM597200	Guatemala	Phyllostomus discolor
HM597201	Guatemala	Phyllostomus discolor
HM597202	Guatemala	Glossophaga soricina/Pteronotus davyi
HM597203	Guatemala	Pteronotus davyi
HM597204	Guatemala	Phyllostomus discolor
HM597205	Guatemala	Pteronotus davyi
HM597206	Guatemala	Sturnira lilium
HM597207	Guatemala	Micronycteris microtis
JF500511	Taiwan	Miniopterus fuliginosus
JF500512	Taiwan	Miniopterus fuliginosus
JF500513	Taiwan	Miniopterus fuliginosus
JF500514	Taiwan	Miniopterus fuliginosus
JF500521	Taiwan	Miniopterus fuliginosus
JF500522	Taiwan	Miniopterus fuliginosus
JQ071378	Peru	Desmodus rotundus
JQ071379	Peru	Desmodus rotundus
JQ071380	Peru	Artibeus obscurus
JQ071381	Peru	Artibeus planirostris
JQ071382	Peru	Artibeus planirostris
JQ071383	Peru	Glossophaga soricina
JQ071384	Peru	Carollia perspicillata
JQ071385	Peru	Carollia perspicillata
JQ071386	Peru	Carollia perspicillata
JQ071387	Peru	Phyllostomus discolor
JQ071388	Peru	Phyllostomus hastatus
JQ071389	Peru	Vampyressa bidens
JQ071390	Peru	Myotis sp.
JQ695834	Poland	Myotis myotis
JQ695835	Poland	Myotis myotis
JQ695836	Poland	Myotis myotis
JQ695837	Poland	Myotis myotis
JQ695838	Poland	Myotis myotis
JQ695839	Poland	Myotis myotis
JQ695840	Poland	Myotis myotis
JX416230	Puerto Rico	Chiroptera sp.
JX416232	French Guiana	Artibeus lituratus
JX416233	Mexico	Chiroptera sp.
JX416236	USA	Corynorhinus townsendii
JX416237	Dominican Republic	Macrotus waterhousii
JX416238	Malaysia	Hipposideros sp.
JX416239	Philippines	Harpyionycteris whiteheadi
JX416241	Slovenia	Myotis nattereri
JX416244	Puerto Rico	Chiroptera sp.
JX416245	Puerto Rico	Chiroptera sp.
JX416247	Peru	Lophostoma silvicolum
JX416248	Mexico	Pteronotus personatus
JX416249	Dominican Republic	Phyllonycteris poeyi
JX416250	Dominican Republic	Macrotus waterhousii
JX416251	Panama	Diaemus youngi
JX416252	Laos	Rhinolophus pearsonii
JX416253	Dominican Republic	Macrotus waterhousii
JX416254	Panama	Noctilio leporinus
JX416255	Philippines	Ptenochirus jagori
JX416256	Malaysia	Pteropus hypomelanus
JX416257	Malaysia	Pteropus hypomelanus
JX416274	Malaysia	Tylonycteris sp.
KF003115	Finland	Eptesicus nilssonii
KF003122	Finland	Myotis daubentonii
KF003129	Finland	Myotis daubentonii
KF003137	Finland	Chiroptera sp.
KJ530741	Puerto Rico	Artibeus jamaicensis
KJ530742	Puerto Rico	Brachyphylla cavernarum
KJ530743	Puerto Rico	Monophyllus redmani
KJ530744	Puerto Rico	Monophyllus redmani
KJ530745	Puerto Rico	Monophyllus redmani
KJ530746	Puerto Rico	Monophyllus redmani
KJ816665	Costa Rica	Phyllostomus discolor
KJ816666	Costa Rica	Anoura geoffroyi
KJ816667	Costa Rica	Myotis keaysi
KJ816669	Costa Rica	Myotis keaysi
KJ816670	Costa Rica	Sturnira lilium
KJ816671	Costa Rica	Sturnira lilium
KJ816672	Costa Rica	Vampyressa thyone
KJ816673	Costa Rica	Sturnira lilium
KJ816674	Costa Rica	Sturnira lilium
KJ816675	Costa Rica	Artibeus lituratus
KJ816676	Costa Rica	Myotis keaysi
KJ816677	Costa Rica	Uroderma bilobatum
KJ816678	Costa Rica	Glossophaga soricina
KJ816679	Costa Rica	Sturnira lilium
KJ816680	Costa Rica	Artibeus lituratus/Sturnira mordax/Sturnira lilium
KJ816681	Costa Rica	Micronycteris microtis
KJ816682	Costa Rica	Artibeus jamaicensis
KJ816683	Costa Rica	Carollia castanea
KJ816684	Costa Rica	Platyrrhinus vittatus
KJ816685	Costa Rica	Artibeus lituratus
KJ816686	Costa Rica	Carollia castanea
KJ816687	Costa Rica	Artibeus lituratus
KJ816688	Costa Rica	Anoura geoffroyi
KJ816689	Costa Rica	Myotis keaysi
KJ816690	Costa Rica	Carollia sowelli
KJ816691	Costa Rica	Carollia perspicillata
KJ816692	Costa Rica	Uroderma bilobatum
KM030503	Kenya	Eidolon helvum
KM030504	Kenya	Eidolon helvum
KM030505	Kenya	Eidolon helvum
KM030506	Kenya	Eidolon helvum
KM030507	Kenya	Eidolon helvum
KM030508	Kenya	Eidolon helvum
KM030509	Kenya	Eidolon helvum
KM030510	Kenya	Eidolon helvum
KM030511	Kenya	Eidolon helvum
KM030512	Nigeria	Eidolon helvum
KM030513	Ghana	Eidolon helvum
KM030514	Ghana	Eidolon helvum
KM030515	Ghana	Eidolon helvum
KM030516	Ghana	Eidolon helvum
KM030517	Ghana	Eidolon helvum
KM030518	Cameroon	Eidolon helvum
KM030519	Tanzania	Eidolon helvum
KM030520	Tanzania	Eidolon helvum
KM030521	Tanzania	Eidolon helvum
KM030522	Tanzania	Eidolon helvum
KM030523	Tanzania	Eidolon helvum
KM030524	Tanzania	Eidolon helvum
KM030525	Tanzania	Eidolon helvum
KM030526	Uganda	Eidolon helvum
B23978*	Kenya	Eidolon helvum
B23982*	Kenya	Eidolon helvum
B23983*	Kenya	Eidolon helvum
B23987*	Kenya	Eidolon helvum
B24003*	Kenya	Eidolon helvum
B24217*	Kenya	Eidolon helvum
B24219*	Kenya	Eidolon helvum
B32112*	Nigeria	Eidolon helvum
B32119*	Nigeria	Eidolon helvum
B32121*	Nigeria	Eidolon helvum
B32133*	Nigeria	Eidolon helvum
B32134*	Nigeria	Eidolon helvum
B32135*	Nigeria	Eidolon helvum
B32136*	Nigeria	Eidolon helvum
B32138*	Nigeria	Eidolon helvum
B32314*	Nigeria	Eidolon helvum
B32395*	Nigeria	Eidolon helvum
B37799*	Equatorial Guinea: Annobón	Eidolon helvum
B37800*	Equatorial Guinea: Annobón	Eidolon helvum
B37802*	Equatorial Guinea: Annobón	Eidolon helvum
B37890*	Equatorial Guinea: Annobón	Eidolon helvum
B37891*	Equatorial Guinea: Annobón	Eidolon helvum
B37893*	Equatorial Guinea: Annobón	Eidolon helvum
B37895*	Equatorial Guinea: Annobón	Eidolon helvum
B37897*	Equatorial Guinea: Annobón	Eidolon helvum
B37898*	Equatorial Guinea: Annobón	Eidolon helvum
B39231*	Ghana	Eidolon helvum
B39235*	Ghana	Eidolon helvum
B39236*	Ghana	Eidolon helvum
B39238*	Ghana	Eidolon helvum
B39239*	Ghana	Eidolon helvum
B39243*	Ghana	Eidolon helvum
B39248*	Ghana	Eidolon helvum
B39284*	Ghana	Eidolon helvum
B39289*	Ghana	Eidolon helvum
B39290*	Ghana	Eidolon helvum
B39294*	Ghana	Eidolon helvum
B39298*	Ghana	Eidolon helvum
B39300*	Ghana	Eidolon helvum
B39302*	Ghana	Eidolon helvum
B39957*	Cameroon	Eidolon helvum
B39958*	Cameroon	Eidolon helvum
B40008*	Tanzania	Eidolon helvum
B40011*	Tanzania	Eidolon helvum
B40015*	Uganda	Eidolon helvum
B40386*	Tanzania	Eidolon helvum
B40389*	Tanzania	Eidolon helvum
B40398*	Tanzania	Eidolon helvum
B40404*	Tanzania	Eidolon helvum
B40407*	Tanzania	Eidolon helvum
B40408*	Tanzania	Eidolon helvum
B40906*	Uganda	Eidolon helvum
B40907*	Uganda	Eidolon helvum
B40910*	Uganda	Eidolon helvum
KP010151	Madagascar	Eidolon dupreanum
KP010152	Madagascar	Eidolon dupreanum
KP010153	Madagascar	Eidolon dupreanum
KP010154	Madagascar	Eidolon dupreanum
KP010155	Madagascar	Eidolon dupreanum
KP010156	Madagascar	Eidolon dupreanum
KP010158	Madagascar	Eidolon dupreanum
KP010159	Madagascar	Eidolon dupreanum
KP010161	Madagascar	Eidolon dupreanum
KP010162	Madagascar	Eidolon dupreanum
KP010163	Madagascar	Eidolon dupreanum
KP010164	Madagascar	Eidolon dupreanum
KP010191	Madagascar	Eidolon dupreanum
KP010192	Madagascar	Eidolon dupreanum
KP010193	Madagascar	Eidolon dupreanum
KP100340	Vietnam	Rhinolophus acuminatus
KP100341	Vietnam	Megaderma spasma
KP100342	Vietnam	Rhinolophus acuminatus
KP100344	Vietnam	Rhinolophus sinicus
KP100345	Vietnam	Rhinolophus acuminatus
KP100347	Vietnam	Rhinolophus acuminatus
KP100348	Vietnam	Rhinolophus acuminatus
KP100349	Vietnam	Rhinolophus acuminatus
KP100350	Vietnam	Rhinolophus acuminatus
KP100351	Vietnam	Rhinolophus acuminatus
KP100354	Vietnam	Hipposideros larvatus
KP100355	Vietnam	Hipposideros larvatus
KP100356	Vietnam	Hipposideros armiger
KP100357	Vietnam	Hipposideros armiger
KP100359	Vietnam	Megaderma lyra
KP100360	Vietnam	Hipposideros larvatus
KP715473	French Guiana	Noctilio albiventris
KP715477	French Guiana	Pteronotus parnellii
KR822802	Finland	Myotis daubentonii
KT751143	Madagascar	Miniopterus aelleni
KT751144	Madagascar	Miniopterus sp.
KT751145	Madagascar	Miniopterus sp.
KT751146	Madagascar	Eidolon dupreanum
KT751147	Madagascar	Scotophilus robustus
KT751148	Madagascar	Eidolon dupreanum
KT751149	Madagascar	Eidolon dupreanum
KT751150	Madagascar	Eidolon dupreanum
KT751151	Madagascar	Eidolon dupreanum
KT751152	Madagascar	Miniopterus gleni
KT751153	Madagascar	Miniopterus griveaudi
KT751154	Madagascar	Miniopterus griveaudi
KT751155	Madagascar	Miniopterus griveaudi
KT751157	Madagascar	Scotophilus marovaza
KX300158	Georgia	Rhinolophus euryale
MK140337	Georgia	Rhinolophus euryale
KX300183	Georgia	Miniopterus schreibersii
B44531*	Georgia	Rhinolophus euryale
B44532*	Georgia	Rhinolophus euryale
MK140343	Georgia	Miniopterus schreibersii
B44534*	Georgia	Rhinolophus euryale
B44535*	Georgia	Rhinolophus euryale
MK140346	Georgia	Pipistrellus pygmaeus
B44537*	Georgia	Rhinolophus euryale
MK140349	Georgia	Miniopterus schreibersii
MK140358	Georgia	Rhinolophus euryale
B44541*	Georgia	Rhinolophus euryale
KX300145	Georgia	Myotis emarginatus
MK140340	Georgia	Rhinolophus ferrumequinum
MK140359	Georgia	Rhinolophus ferrumequinum
B44548*	Georgia	Rhinolophus euryale
B44550*	Georgia	Rhinolophus euryale
KY679155	Georgia	Rhinolophus ferrumequinum
B44553*	Georgia	Rhinolophus ferrumequinum
B44584*	Georgia	Miniopterus schreibersii
B44585*	Georgia	Miniopterus schreibersii
B44586*	Georgia	Miniopterus schreibersii
MK140360	Georgia	Myotis blythii
MK140361	Georgia	Myotis emarginatus
B44589*	Georgia	Rhinolophus ferrumequinum
MK140386	Georgia	Myotis blythii
KX300107	Georgia	Myotis blythii
KY679154	Georgia	Miniopterus schreibersii
MK140363	Georgia	Myotis blythii
MK140371	Georgia	Myotis emarginatus
B44596*	Georgia	Myotis emarginatus
B44598*	Georgia	Miniopterus schreibersii
KX300192	Georgia	Miniopterus schreibersii
MK140374	Georgia	Rhinolophus ferrumequinum
KX300112	Georgia	Myotis blythii
KX300117	Georgia	Myotis blythii
MK140344	Georgia	Miniopterus schreibersii
MK140339	Georgia	Rhinolophus euryale
B44605*	Georgia	Rhinolophus euryale
B44606*	Georgia	Rhinolophus euryale
B44607*	Georgia	Rhinolophus euryale
KX300195	Georgia	Miniopterus schreibersii
MK140353	Georgia	Miniopterus schreibersii
MK140350	Georgia	Miniopterus schreibersii
B44611*	Georgia	Miniopterus schreibersii
B44612*	Georgia	Rhinolophus ferrumequinum
MK140375	Georgia	Rhinolophus ferrumequinum
B44614*	Georgia	Miniopterus schreibersii
KX300149	Georgia	Myotis emarginatus
MK140377	Georgia	Myotis blythii
B44620*	Georgia	Myotis blythii
B44621*	Georgia	Myotis blythii
KX300123	Georgia	Myotis blythii
B44623*	Georgia	Myotis emarginatus
B44626*	Georgia	Rhinolophus euryale
MK140338	Georgia	Rhinolophus euryale
B44628*	Georgia	Myotis emarginatus
B44629*	Georgia	Miniopterus schreibersii
MK140372	Georgia	Myotis blythii
B44632*	Georgia	Miniopterus schreibersii
MK140356	Georgia	Miniopterus schreibersii
B44634*	Georgia	Myotis emarginatus
MK140354	Georgia	Miniopterus schreibersii
B44636*	Georgia	Miniopterus schreibersii
MK140351	Georgia	Miniopterus schreibersii
B44638*	Georgia	Miniopterus schreibersii
B44639*	Georgia	Myotis emarginatus
B44640*	Georgia	Myotis emarginatus
B44641*	Georgia	Myotis blythii
MK140380	Georgia	Rhinolophus ferrumequinum
MK140345	Georgia	Myotis blythii
MK140369	Georgia	Myotis emarginatus
MK140373	Georgia	Miniopterus schreibersii
MK140352	Georgia	Rhinolophus euryale
MK140341	Georgia	Miniopterus schreibersii
B44654*	Georgia	Miniopterus schreibersii
B44655*	Georgia	Miniopterus schreibersii
B44656*	Georgia	Rhinolophus euryale
MK140355	Georgia	Myotis blythii
KX300165	Georgia	Rhinolophus ferrumequinum
B44659*	Georgia	Myotis blythii
B44660*	Georgia	Myotis blythii
MK140364	Georgia	Myotis blythii
B44662*	Georgia	Myotis blythii
B44663*	Georgia	Myotis blythii
MK140383	Georgia	Myotis blythii
B44666*	Georgia	Rhinolophus euryale
MK140384	Georgia	Chiroptera sp.
B44669*	Georgia	Rhinolophus euryale
MK140385	Georgia	Rhinolophus ferrumequinum
MK140370	Georgia	Myotis blythii
B44673*	Georgia	Myotis blythii
B44674*	Georgia	Myotis blythii
B44675*	Georgia	Myotis blythii
B44676*	Georgia	Myotis blythii
MK140362	Georgia	Chiroptera sp.
B44681*	Georgia	Myotis blythii
B44683*	Georgia	Miniopterus schreibersii
MK140342	Georgia	Chiroptera sp.
B44687*	Georgia	Rhinolophus euryale
B44688*	Georgia	Miniopterus schreibersii
MK140348	Georgia	Miniopterus schreibersii
B44691*	Georgia	Myotis blythii
B44692*	Georgia	Miniopterus schreibersii
MK140365	Georgia	Myotis emarginatus
MK140376	Georgia	Myotis emarginatus
MK140366	Georgia	Eptesicus serotinus
B44699*	Georgia	Rhinolophus euryale
MK140381	Georgia	Rhinolophus euryale
MK140347	Georgia	Eptesicus serotinus
MK140357	Georgia	Miniopterus schreibersii
B44704*	Georgia	Rhinolophus euryale
B44705*	Georgia	Myotis blythii
KX300169	Georgia	Rhinolophus ferrumequinum
MK140382	Georgia	Myotis blythii
B44708*	Georgia	Miniopterus schreibersii
B44709*	Georgia	Miniopterus schreibersii
B44710*	Georgia	Miniopterus schreibersii
KX300127	Georgia	Myotis blythii
B44712*	Georgia	Rhinolophus ferrumequinum
B44713*	Georgia	Chiroptera sp.
MK140368	Georgia	Eptesicus serotinus
KX300131	Georgia	Myotis blythii
B44716*	Georgia	Myotis blythii
B44717*	Georgia	Myotis blythii
KX300136	Georgia	Myotis blythii
B44720*	Georgia	Myotis emarginatus
B44721*	Georgia	Myotis blythii
KX300200	Georgia	Eptesicus serotinus
KX300154	Georgia	Myotis emarginatus
B44726*	Georgia	Chiroptera sp.
B44728*	Georgia	Myotis blythii
B44729*	Georgia	Miniopterus schreibersii
KX300140	Georgia	Myotis blythii
MK140367	Georgia	Myotis emarginatus
MK140378	Georgia	Chiroptera sp.
MK140387	Georgia	Pipistrellus pygmaeus
MK140379	Georgia	Myotis emarginatus
B44736*	Georgia	Myotis emarginatus
KY232222	Thailand	Hipposideros fulvus
KY232212	Thailand	Hipposideros armiger
KY232213	Thailand	Hipposideros armiger
KY232185	Thailand	Hipposideros armiger
KY232186	Thailand	Hipposideros armiger
KY232223	Thailand	Hipposideros larvatus
KY232224	Thailand	Hipposideros sp.
KY232214	Thailand	Hipposideros larvatus
KY232215	Thailand	Hipposideros larvatus
KY232187	Thailand	Hipposideros larvatus
KY232188	Thailand	Hipposideros larvatus
KY232189	Thailand	Hipposideros larvatus
KY232190	Thailand	Hipposideros larvatus
KY232216	Thailand	Hipposideros larvatus
KY232191	Thailand	Hipposideros larvatus
KY232217	Thailand	Hipposideros larvatus
KY232192	Thailand	Hipposideros larvatus
KY232218	Thailand	Hipposideros larvatus
KY232193	Thailand	Taphozous melanopogon
KY232194	Thailand	Taphozous melanopogon
KY232219	Thailand	Hipposideros larvatus
KY232221	Thailand	Hipposideros larvatus
KY232220	Thailand	Hipposideros larvatus
KY232195	Thailand	Hipposideros larvatus
KY232196	Thailand	Chaerephon plicatus
KY232197	Thailand	Chaerephon plicatus
KY232183	Thailand	Chaerephon plicatus
KY232198	Thailand	Chaerephon plicatus
KY232199	Thailand	Chaerephon plicatus
KY232200	Thailand	Chaerephon plicatus
KY232201	Thailand	Chaerephon plicatus
KY232202	Thailand	Chaerephon plicatus
KY232203	Thailand	Chaerephon plicatus
KY232204	Thailand	Chaerephon plicatus
KY232205	Thailand	Chaerephon plicatus
KY232206	Thailand	Chaerephon plicatus
KY232207	Thailand	Chaerephon plicatus
KY232208	Thailand	Chaerephon plicatus
KY232209	Thailand	Chaerephon plicatus
KY232210	Thailand	Chaerephon plicatus
KY232184	Thailand	Chaerephon plicatus
KY232211	Thailand	Chaerephon plicatus
*Unpublished data from CDC Bartonella database.
Remaining data come from 19 previous studies on Bartonella in bats (Anh et al., 2015; Bai et al., 2010, 2011, 2012, 2015; Brook et al., 2015; Concannon et al., 2005; Davoust et al., 2016; Judson et al., 2015; Kosoy et al., 2010; Lilley et al., 2015; Lin et al., 2010, 2012; McKee et al., 2017; Morse et al., 2012; Olival et al., 2015; Podsiadly et al., 2010; Szubert-Kruszyńska et al., 2018; Urushad…

## Sheet: S5
Codon partitioning model selection	Path sampling marginal likelihood	Stepping-stone marginal likelihood	AICM	Harmonic mean (HM) likelihood
No partition	-14671	-14712.4	22575.8	-11002.4
1+2, 3 partition	-14510.1	-14545.9	22247.2	-10818.4
1, 2, 3 partition	-14467.4	-14506.9	22194.7	-10781.4
Path sampling Bayes factors	No partition	1+2, 3 partition	1, 2, 3 partition
No partition	0	-160.91	-203.61
1+2, 3 partition	160.91	0	-42.7
1, 2, 3 partition	203.61	42.7	0
Stepping-stone Bayes factors	No partition	1+2, 3 partition	1, 2, 3 partition
No partition	0	-166.5	-205.51
1+2, 3 partition	166.5	0	-39.01
1, 2, 3 partition	205.51	39.01	0
ΔAICM	No partition	1+2, 3 partition	1, 2, 3 partition
No partition	0	328.64	381.12
1+2, 3 partition	-328.64	0	52.48
1, 2, 3 partition	-381.12	-52.48	0
HM likelihood Bayes factors	No partition	1+2, 3 partition	1, 2, 3 partition
No partition		0	-220.98
1+2, 3 partition	183.98	0	-37
1, 2, 3 partition	220.98	37	0
AICM, Akaike’s information criterion using Markov chain Monte Carlo (Raftery et al., 2007).

## Sheet: S6
Codon partitioning model selection	Path sampling marginal likelihood	Stepping-stone marginal likelihood	AICM	Harmonic mean (HM) likelihood
No partition	-4990.04	-4996.13	6819.71	-3319.26
1+2, 3 partition	-4887.65	-4908.51	6600.16	-3194.76
1, 2, 3 partition	-4883.94	-4904.19	6567.7	-3176.95
Path sampling Bayes factors	No partition	1+2, 3 partition	1, 2, 3 partition
No partition	0	-102.39	-106.1
1+2, 3 partition	102.39	0	-3.71
1, 2, 3 partition	106.1	3.71	0
Stepping-stone Bayes factors	No partition	1+2, 3 partition	1, 2, 3 partition
No partition	0	-87.62	-91.94
1+2, 3 partition	87.62	0	-4.32
1, 2, 3 partition	91.94	4.32	0
ΔAICM	No partition	1+2, 3 partition	1, 2, 3 partition
No partition	0	219.54	252
1+2, 3 partition	-219.54	0	32.46
1, 2, 3 partition	-252	-32.46	0
HM likelihood Bayes factors	No partition	1+2, 3 partition	1, 2, 3 partition
No partition	0	-124.5	-142.31
1+2, 3 partition	124.5	0	-17.81
1, 2, 3 partition	142.31	17.81	0
AICM, Akaike’s information criterion using Markov chain Monte Carlo (Raftery et al., 2007).

## Sheet: S7
Codon partitioning model selection	Path sampling marginal likelihood	Stepping-stone marginal likelihood	AICM	Harmonic mean (HM) likelihood
Constant size	-14467.4	-14506.9	22194.7	-10781.4
Yule	-14992.4	-15028.5	23106.8	-11007.2
BD	-14387.9	-14425	21915.9	-10679.7
IBD	-14284.5	-14305.5	21890.5	-10689.7
Path sampling Bayes factors	Constant size	Yule	BD	IBD
Constant size	0	525.02	-79.48	-182.91
Yule	-525.02	0	-604.5	-707.93
BD	79.48	604.5	0	-103.43
IBD	182.91	707.93	103.43	0
Stepping-stone Bayes factors	Constant size	Yule	BD	IBD
Constant size	0	521.63	-81.9	-201.34
Yule	-521.63	0	-603.53	-722.97
BD	81.9	603.53	0	-119.44
IBD	201.34	722.97	119.44	0
ΔAICM	Constant size	Yule	BD	IBD
Constant size	0	-912.11	278.79	304.2
Yule	912.11	0	1190.9	1216.31
BD	-278.79	-1190.9	0	25.4
IBD	-304.2	-1216.31	-25.4	0
HM likelihood Bayes factors	Constant size	Yule	BD	IBD
Constant size	0	225.83	-101.69	-91.73
Yule	-225.83	0	-327.51	-317.55
BD	101.69	327.51	0	9.96
IBD	91.73	317.55	-9.96	0
BD, birth-death model.
IBD, birth-death model with incomplete sampling.
AICM, Akaike’s information criterion using Markov chain Monte Carlo (Raftery et al., 2007).

## Sheet: S8
Codon partitioning model selection	Path sampling marginal likelihood	Stepping-stone marginal likelihood	AICM	Harmonic mean (HM) likelihood
Constant size	-4883.94	-4904.19	6567.7	-3176.95
Yule	-5191.31	-5208.92	7218.88	-3371
BD	-4869.15	-4887.48	6439.17	-3125.65
IBD	-4842.64	-4853.77	6453.72	-3142.87
Path sampling Bayes factors	Constant size	Yule	BD	IBD
Constant size	0	307.37	-14.79	-41.3
Yule	-307.37	0	-322.16	-348.67
BD	14.79	322.16	0	-26.51
IBD	41.3	348.67	26.51	0
Stepping-stone Bayes factors	Constant size	Yule	BD	IBD
Constant size	0	304.73	-16.71	-50.42
Yule	-304.73	0	-321.43	-355.15
BD	16.71	321.43	0	-33.72
IBD	50.42	355.15	33.72	0
ΔAICM	Constant size	Yule	BD	IBD
Constant size	0	-651.18	128.53	113.99
Yule	651.18	0	779.71	765.16
BD	-128.53	-779.71	0	-14.55
IBD	-113.99	-765.16	14.55	0
HM likelihood Bayes factors	Constant size	Yule	BD	IBD
Constant size	0	194.05	-51.3	-34.08
Yule	-194.05	0	-245.35	-228.13
BD	51.3	245.35	0	17.22
IBD	34.08	228.13	-17.22	0
BD, birth-death model.
IBD, birth-death model with incomplete sampling.
AICM, Akaike’s information criterion using Markov chain Monte Carlo (Raftery et al., 2007).

## Sheet: S9
Rate partitioning model selection	Path sampling marginal likelihood	Stepping-stone marginal likelihood	AICM	Harmonic mean (HM) likelihood
Species, symmetrical	-5549.34	-5557.75	7606.59	-3608.75
Species, asymmetrical	-5552.63	-5568.94	7642.82	-3615.13
Bayes factor/delta AICM	3.29	11.19	-36.23	6.39
Genus, symmetrical	-5150.55	-5158.44	7033.01	-3395.18
Genus, asymmetrical	-5161.28	-5171.93	7041.64	-3387.16
Bayes factor/delta AICM	10.73	13.49	-8.63	-8.03
Tribe, symmetrical	-5142.6	-5152.03	7041.5	-3380.42
Tribe, asymmetrical	-5158.92	-5174.42	7031.55	-3387.17
Bayes factor/delta AICM	16.31	22.39	9.95	6.74
Family, symmetrical	-4999.38	-5011.45	6742.8	-3260.9
Family, asymmetrical	-5000.45	-5011.71	6757.28	-3259.17
Bayes factor/delta AICM	1.07	0.26	-14.48	-1.73
Subfamily, symmetrical	-5083.32	-5037.78	6956.7	-3345.27
Subfamily, asymmetrical	-5128.32	-5141.34	6965.7	-3347.46
Bayes factor/delta AICM	45	103.56	-9	2.2
Superfamily, symmetrical	-4898.4	-4906.87	6577.18	-3185.96
Superfamily, asymmetrical	-4909.87	-4921.79	6589.7	-3191.15
Bayes factor/delta AICM	11.47	14.93	-12.52	5.19
AICM, Akaike’s information criterion using Markov chain Monte Carlo (Raftery et al., 2007).

## Sheet: S10
Bartonella OTU	Bartonella lineage(s)	Associated bat/ectoparasite species	Geographic origin	Count
OTU1	Mini-1/1.1	Eptesicus serotinus	GE	1
OTU1	Mini-1/1.1	Miniopterus schreibersii	GE, RO, HU	48
OTU1	Mini-1/1.1	Myotis blythii	GE, RO	2
OTU1	Mini-1/1.1	Myotis daubentonii	RO	2
OTU1	Mini-1/1.1	Pipistrellus pygmaeus	GE	1
OTU1	Mini-1/1.1	Rhinolophus euryale	GE	1
OTU1	Mini-1/1.1	Nycteribia schmidlii	RO, HU	22
OTU1	Mini-1/1.1	Penicillidia conspicua	RO	9
OTU2	Mini-2	Miniopterus schreibersii	GE, RO, HU	10
OTU2	Mini-2	Penicillidia dufourii	HU	1
OTU2	Mini-2	Nycteribia schmidlii	RO	2
OTU3	Mini-3/Vesp-10	Miniopterus schreibersii	GE, RO, HU	24
OTU3	Mini-3/Vesp-10	Myotis bechsteinii	BE, HU	3
OTU3	Mini-3/Vesp-10	Myotis blythii	GE	3
OTU3	Mini-3/Vesp-10	Myotis daubentonii	RO, HU, BE, NL	14
OTU3	Mini-3/Vesp-10	Myotis myotis	RO, HU	10
OTU3	Mini-3/Vesp-10	Myotis nattereri	HU, SI	3
OTU3	Mini-3/Vesp-10	Rhinolophus ferrumequinum	RO	3
OTU3	Mini-3/Vesp-10	Nycteribia schmidlii	HU, RO	14
OTU3	Mini-3/Vesp-10	Penicillidia conspicua	RO	3
OTU3	Mini-3/Vesp-10	Basilia nana	HU, RO, BE	4
OTU3	Mini-3/Vesp-10	Ixodes ariadnae	BE	1
OTU3	Mini-3/Vesp-10	Nycteribia kolenatii	HU, RO, BE, NL	24
OTU3	Mini-3/Vesp-10	Penicillidia dufourii	RO	1
OTU3	Mini-3/Vesp-10	Basilia nattereri	HU, SI	3
OTU4	Rhin-5	Rhinolophus euryale	GE, RO	10
OTU4	Rhin-5	Rhinolophus ferrumequinum	GE	3
OTU4	Rhin-5	Rhinolophus mehelyi	RO	1
OTU4	Rhin-5	Phthiridium biarticulatum	RO	5
OTU5	Rhin-6	Rhinolophus mehelyi	RO	2
OTU5	Rhin-6	Phthiridium biarticulatum	RO	2
OTU11	Rhin-2/3	Myotis blythii	GE	2
OTU11	Rhin-2/3	Rhinolophus blasii	RO	1
OTU11	Rhin-2/3	Rhinolophus euryale	GE, RO	2
OTU11	Rhin-2/3	Rhinolophus ferrumequinum	GE	4
OTU11	Rhin-2/3	Rhinolophus mehelyi	RO	1
OTU11	Rhin-2/3	Phthiridium biarticulatum	RO	3
OTU16	Rhin-4	Miniopterus schreibersii	GE	1
OTU16	Rhin-4	Rhinolophus blasii	RO	2
OTU16	Rhin-4	Rhinolophus euryale	GE	17
OTU16	Rhin-4	Rhinolophus ferrumequinum	GE, RO	4
OTU16	Rhin-4	Rhinolophus mehelyi	RO	1
OTU16	Rhin-4	Phthiridium biarticulatum	RO	4
OTU19	Vesp-6/7/8	Eptesicus serotinus	GE, NL	2
OTU19	Vesp-6/7/8	Miniopterus schreibersii	RO	1
OTU19	Vesp-6/7/8	Myotis bechsteinii	BE	5
OTU19	Vesp-6/7/8	Myotis blythii	GE, HU	22
OTU19	Vesp-6/7/8	Myotis dasycneme	NL	49
OTU19	Vesp-6/7/8	Myotis daubentonii	BE, NL, HU, FI	18
OTU19	Vesp-6/7/8	Myotis emarginatus	GE	6
OTU19	Vesp-6/7/8	Myotis myotis	PL	7
OTU19	Vesp-6/7/8	Nyctalus noctula	NL	1
OTU19	Vesp-6/7/8	Pipistrellus nathusii	NL	2
OTU19	Vesp-6/7/8	Pipistrellus pipistrellus	NL	3
OTU19	Vesp-6/7/8	Plecotus auritus	NL, BE	5
OTU19	Vesp-6/7/8	Penicillidia conspicua	RO	1
OTU19	Vesp-6/7/8	Ixodes ariadnae	BE	3
OTU19	Vesp-6/7/8	Spinturnix andegavinus	BE, NL	22
OTU19	Vesp-6/7/8	Penicillidia dufourii	HU	1
OTU19	Vesp-6/7/8	Cimex pipistrelli	NL	46
OTU19	Vesp-6/7/8	Macronyssidae sp. 4	NL	1
OTU19	Vesp-6/7/8	Nycteribia kolenatii	HU	2
OTU19	Vesp-6/7/8	Spinturnix myoti	PL	5
OTU19	Vesp-6/7/8	Spinturnix plecotina	BE, NL	5
OTU19	Vesp-6/7/8	Argas vespertilionis	NL	3
OTU20	Vesp-9	Myotis blythii	GE	1
OTU20	Vesp-9	Myotis emarginatus	GE	8
OTU20	Vesp-9	Miniopterus schreibersii	GE, HU	2
OTU20	Vesp-9	Penicillidia conspicua	HU	1
OTU21	Vesp-15	Myotis dasycneme	NL	1
OTU21	Vesp-15	Pipistrellus nathusii	NL	1
OTU21	Vesp-15	Cimex pipistrelli	NL	1
OTU21	Vesp-15	Spinturnix andegavinus	NL	1
EsSk	Ept.ser_Spi.kol_26S83	Eptesicus serotinus	NL	1
EsSk	Ept.ser_Spi.kol_26S83	(Spinturnicidae sp. 1) Spinturnix kolenatii*	NL	1
OTU22	Vesp-16	Myotis daubentonii	FI, BE, RO	6
OTU22	Vesp-16	Miniopterus schreibersii	RO	1
OTU22	Vesp-16	Nycteribia kolenatii	BE, RO	6
OTU24	Vesp-4/5	Miniopterus schreibersii	RO	3
OTU24	Vesp-4/5	Myotis bechsteinii	BE, HU	3
OTU24	Vesp-4/5	Myotis blythii	GE, RO	7
OTU24	Vesp-4/5	Myotis daubentonii	BE, NL, HU, RO	6
OTU24	Vesp-4/5	Myotis myotis	RO	6
OTU24	Vesp-4/5	Myotis nattereri	HU	1
OTU24	Vesp-4/5	Nycteribia kolenatii	BE, NL, HU, RO	15
OTU24	Vesp-4/5	Basilia nana	BE, HU	3
OTU24	Vesp-4/5	Basilia nattereri	HU	1
OTU25	Rhin-1	Rhinolophus ferrumequinum	GE	3
OTU25	Rhin-1	Myotis emarginatus	GE	1
OTU26	Vesp-1/2/3	Eptesicus nilssonii	FI	1
OTU26	Vesp-1/2/3	Eptesicus serotinus	NL, GE	4
OTU26	Vesp-1/2/3	Myotis blythii	GE	1
OTU26	Vesp-1/2/3	Myotis dasycneme	NL	24
OTU26	Vesp-1/2/3	Myotis daubentonii	BE, FI, UK	3
OTU26	Vesp-1/2/3	Myotis emarginatus	GE	2
OTU26	Vesp-1/2/3	Myotis mystacinus	UK	1
OTU26	Vesp-1/2/3	Nyctalus noctula	NL	1
OTU26	Vesp-1/2/3	Pipistrellus nathusii	NL	20
OTU26	Vesp-1/2/3	Pipistrellus pipistrellus	NL	1
OTU26	Vesp-1/2/3	Ischnopsyllus variabilis	NL	10
OTU26	Vesp-1/2/3	(Spinturnicidae sp. 1) Spinturnix kolenatii*	NL	1
OTU26	Vesp-1/2/3	Cimex pipistrelli	NL	21
OTU26	Vesp-1/2/3	Macronyssidae sp. 4	NL	2
OTU26	Vesp-1/2/3	Spinturnix andegavinus	BE	1
OTU26	Vesp-1/2/3	Spinturnicidae sp. 2	NL	1
OTU26	Vesp-1/2/3	Argas vespertilionis	NL	14
OTU27	Vesp-17	Nyctalus noctula	UK	1
OTU27	Vesp-17	Cimex pipistrelli	NL	2
OTU31	Vesp-13	Miniopterus schreibersii	RO	21
OTU31	Vesp-13	Myotis blythii	RO	2
OTU31	Vesp-13	Myotis capaccinii	RO	1
OTU31	Vesp-13	Myotis daubentonii	BE, NL, RO	3
OTU31	Vesp-13	Myotis myotis	RO	2
OTU31	Vesp-13	Pipistrellus pygmaeus	GE	1
OTU31	Vesp-13	Rhinolophus ferrumequinum	RO	1
OTU31	Vesp-13	Nycteribia schmidlii	RO	2
OTU31	Vesp-13	Penicillidia conspicua	RO	19
OTU31	Vesp-13	Phthiridium biarticulatum	RO	1
OTU31	Vesp-13	Nycteribia kolenatii	BE, NL, RO	6
OTU32	Vesp-14	Myotis bechsteinii	BE	2
OTU32	Vesp-14	Myotis daubentonii	NL, HU, RO	5
OTU32	Vesp-14	Nycteribia kolenatii	NL, HU, RO	5
OTU32	Vesp-14	Basilia nana	BE	2
OTU33	Vesp-12	Myotis dasycneme	NL	6
OTU33	Vesp-12	Eptesicus serotinus	NL	1
OTU33	Vesp-12	Myotis emarginatus	GE	1
OTU33	Vesp-12	Ischnopsyllus variabilis	NL	1
OTU33	Vesp-12	Cimex pipistrelli	NL	5
OTU33	Vesp-12	Macronyssidae sp. 4	NL	1
OTU42	Vesp-11	Myotis blythii	GE	2
OTU42	Vesp-11	Myotis myotis	HU	1
OTU42	Vesp-11	Nycteribia kolenatii	HU	1
*Inferred based on phylogenetic position and host associations from Bruyndonckx et al. (2009).
Country abbreviations: GE, Georgia; RO, Romania; HU, Hungary; BE, Belgium; NL, Netherlands; SI, Slovenia; FI, Finland; PL, Poland; UK, United Kingdom.

[truncated: 10 more sheets: S11, S12, S13, S14, S15, S16, S17, S18, S19, S20]
